# Supplementary material
Source: publisher site journal article supplement (https://www.dovepress.com/article/301644)
Supplement: Supplementary file 1 [file get_supplementary_file.php]

**Supplementary Material**

Figure S1 Example DCE question.

| Medicine Feature | **Medicine A** | **Medicine B** |
| --- | --- | --- |
| How you take the “OFF” episode medicine | Inhaled  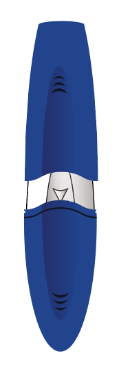 | Dissolvable sublingual film  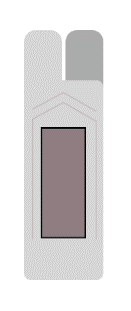 |
| Possible side effect from medicine | Cough or mild respiratory infection | Mouth or lip sores |
| How long until you are fully back “ON” | 30 min | 30 min |
| How long the “OFF” episode medicine treats your symptoms | 1.5 h | 2 h |
| Out-of-pocket cost for a 30-day supply of the medicine | $10 | $10 |
|  |  |  |
| **Which would you choose?** |  |  |

The mode of administration and mode-specific adverse events were modeled in the experimental design as 1 attribute with 6 levels. In the DCE questions presented to the respondent, the mode of administration and adverse event were put on 2 rows to make the question easier to read.

Note: The levels of the attributes varied across the choice questions. Table 1 presents the full range of levels for each attribute. The individual combination of attribute levels shown for Medicine A and Medicine B in each question is theoretical and does not reflect the profile of any actual treatment.

**Abbreviation:** DCE, discrete choice experiment.

Figure S2 Conditional relative attribute importance of changing each attribute of a theoretical treatment from the least preferred level to the most preferred level. The sum of the relative attribute importance calculations is scaled to 100, and the conditional importance of each attribute is a percentage of the total. The vertical bars surrounding each relative importance weight estimate denote the 95% CI. Abbreviations: AE, adverse event; CI, confidence interval.


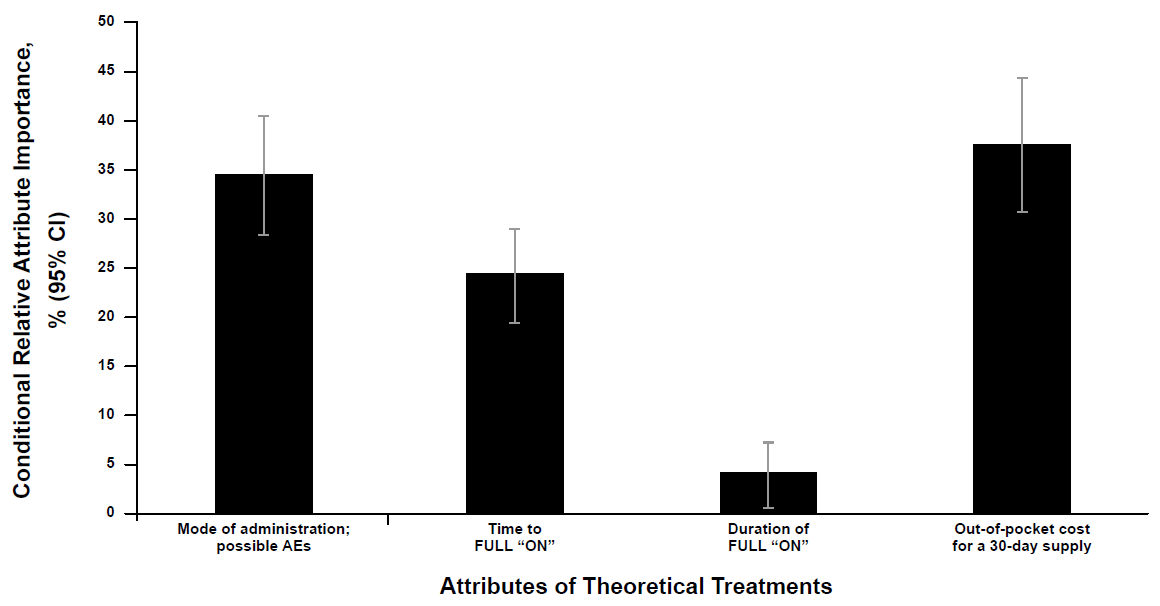


Table S1 Theoretical profiles for preference share predictions

| Attribute | Theoretical Treatment A | Theoretical Treatment B | Theoretical Treatment C |
| --- | --- | --- | --- |
| **Scenario 1** |  |  |  |
| How you take the on-demand treatment and possible adverse events from the medicine | Dissolvable sublingual film; mouth or lip sores | Injected; injection-site reactions | Inhaled; cough or mild respiratory infection |
| Time to FULL “ON” | 30 min | 15 min | 30 min |
| Duration of FULL “ON” | 1 h | 1 h | 1 h |
| Out-of-pocket cost for a 30-day supply of the medicine | $30 | $30 | $30 |
| **Scenario 2** |  |  |  |
| How you take the on-demand treatment and possible adverse events from the medicine | Dissolvable sublingual film; mouth or lip sores | Injected; injection-site reactions | Inhaled; cough or mild respiratory infection |
| Time to FULL “ON” | 30 min | 30 min | 30 min |
| Duration of FULL “ON” | 1.5 h | 1 h | 1 h |
| Out-of-pocket cost for a 30-day supply of the medicine | $30 | $30 | $30 |

**Table S2** Preference weights for attribute levels of theoretical treatments

| **Attribute** | **Level** | **Preference weight (95% CI)** |
| --- | --- | --- |
| Mode of administration; adverse event | Inhaled; none | 0.446 (0.244, 0.648) |
|  | Inhaled; cough or mild respiratory infection | –0.336 (–0.542, –0.130) |
|  | Injected; none | –0.418 (–0.632, –0.203) |
|  | Injected; injection-site reactions | –1.056 (–1.294, –0.819) |
|  | Dissolvable sublingual film; none | 1.072 (0.851, 1.294) |
|  | Dissolvable sublingual film; mouth or lip sores | 0.291 (0.035, 0.547) |
| Time to FULL “ON” | 15 min | 0.718 (0.560, 0.877) |
|  | 30 min | 0.057 (–0.047, 0.161) |
|  | 60 min | –0.775 (–0.933, –0.617) |
| Duration of FULL “ON” | 1 h | –0.115 (–0.230, 0.001) |
|  | 1.5 h | –0.010 (–0.128, 0.108) |
|  | 2 h | 0.125 (0.005, 0.245) |
| Out-of-pocket cost for a 30-day supply of the medicine | $0 (no cost) | 0.838 (0.684, 0.992) |
|  | $10 | 0.580 (0.473, 0.687) |
|  | $30 | 0.064 (0.053, 0.076) |
|  | $90 | –1.483 (–1.756, –1.210) |
| **Abbreviation:** CI, confidence interval. |  |  |

Table S3 WTP for changes in attribute levels of theoretical treatments

| Attribute | From level | To level | Mean WTP (95% CI),a $ |
| --- | --- | --- | --- |
| Mode of administration; adverse event | Injected; injection-site reactions | Dissolvable sublingual film; none | 83 (66, 99) |
| Injected; injection-site reactions | Inhaled; none | 58 (43, 73) |
| Injected; none | Dissolvable sublingual film; none | 58 (43, 72) |
| Inhaled; cough or mild respiratory infection | Dissolvable sublingual film; none | 55 (40, 69) |
| Injected; injection-site reactions | Dissolvable sublingual film; mouth or lip sores | 52 (36, 69) |
| Injected; none | Inhaled; none | 33 (20, 47) |
| Dissolvable sublingual film; mouth or lip sores | Dissolvable sublingual film; none | 30 (17, 44) |
| Inhaled; cough or mild respiratory infection | Inhaled; none | 30 (18, 43) |
| Injected; injection-site reactions | Inhaled; cough or mild respiratory infection | 28 (15, 40) |
| Injected; none | Dissolvable sublingual film; mouth or lip sores | 27 (12, 43) |
| Injected; injection-site reactions | Injected; none | 25 (12, 38) |
| Inhaled; cough or mild respiratory infection | Dissolvable sublingual film; mouth or lip sores | 24 (10, 39) |
| Inhaled; none | Dissolvable sublingual film; none | 24 (12, 36) |
| Dissolvable sublingual film; mouth or lip sores | Inhaled; none | 6 (−8, 20) |
| Injected; none | Inhaled; cough or mild respiratory infection | 3 (−9, 15) |
| Time to FULL “ON” | 60 min | 15 min | 58 (46, 70) |
| 60 min | 30 min | 32 (24, 41) |
| 30 min | 15 min | 26 (17, 34) |
| Duration of FULL “ON” | 1 h | 2 h | 9 (1, 17) |
| 1.5 h | 2 h | 5 (−3, 13) |
| 1 h | 1.5 h | 4 (−4, 12) |

**Abbreviations:** CI, confidence interval; WTP, willingness to pay.

a The 95% CIs were calculated using the delta method.
